# Supplementary material
Source: publisher figshare collection journal article supplement (https://springernature.figshare.com/ndownloader/files/15340382)
Supplement: Supplementary file 1 [file 15340382]

## Video transcript: Part 2

Thank you for taking part in this scientific research study.

Last time, you were asked to learn associations between words and locations around a circle. This time, in Part 2, you will be required to remember and report the word-location associations as accurately as possible.

### Part 2 should last no more than 20 minutes

As before, the circular dial will be shown on each trial. This time, however, both the marker and a word will be visible at the beginning of the trial.

The word will have been previously shown in part 1 and you will be required to remember its associated location on the circle. Please move the marker to the position that you remember being associated with the word as accurately as possible.

If you do not remember the location associated with that word, simply make a guess.

Once you have replaced the marker click on the “Submit” button to move onto the next trial.

Once Part 2 of the task has been completed, we will send you a website link back to Prolific.ac that where you can claim payment.

We ask that you complete each part of the experiment on a laptop or desktop computer, preferably equipped with a handheld computer mouse. Please do not attempt to use a smartphone or tablet as the task will not run on mobile devices.

This research project is being carried out by Doctors Sam Berens and Aidan Horner, both of whom are researchers at the University of York in the United Kingdom. If you have any questions, comments, or complaints about the study, please feel free to email them:

Dr Sam Berens: [sam.berens@york.ac.uk](mailto:sam.berens@york.ac.uk)

Dr Aidan Horner: [aidan.horner@york.ac.uk](mailto:aidan.horner@york.ac.uk)
