# Supplementary material
Source: publisher figshare collection journal article supplement (https://springernature.figshare.com/ndownloader/files/15340382)
Supplement: Supplementary file 2 [file 15340382]

# Video transcript: Part 1

Thank you for taking part in this scientific research study.

This project is investigating our ability to remember information over long periods of time.

You will be asked to complete a simple computer based task consisting of two parts. Part 1 will run immediately after these instructions. Here, you will be asked to learn associations between words and locations around a circle. Part 2 will run...

**[immediately / 3 hours / 6 hours / 12 hours / 1 day / 2 days / 4 days]**

...after Part 1. In Part 2 you will be required to remember and report the word-location associations as accurately as possible.

**[It is important to ensure that you will be able to complete Part 2 the scheduled date and time shown above. If you know that you will be unable to do this, please do not proceed with the experiment now. As long as you have not started Part 1, you will be able to restart the experiment at a time that is more convenient. Please note, you will only receive full payment after completing both Part 1 and Part 2. If you do decide to proceed with the experiment now, you will shortly receive a web-link via email that will allow you to run Part 2 within 1 hour of the scheduled time shown above.]**

Part 1 should last no more than 30 minutes.

1. On each trial, a circular dial will be shown with a marker placed at some point around the perimeter.
2. One second after the start of the trial, the marker will disappear and a word will be printed in the centre of the circle. This word will refer to a physical object that can be found in the real world (for instance, an anchor).
3. At this point, we would like you to visualise an image of the object appearing just outside the circle, directly next to the location of the previously visible marker. Please try to remember this association as you will be tested on it in Part 2.
4. Three seconds after the word first appeared the marker will reappear in a random location. Using your computer mouse, you will have to move the marker back to the location that it was indicated at the start of the trial. Having done so, click the "Submit" button in order to progress to the next trial.
5. If you replace the marker too far from its original location, the trial will be repeated.

Part 2 will start running...

**[immediately / 3 hours / 6 hours / 12 hours / 1 day / 2 days / 4 days]**

...after part 1 has finished. It should last no more than 20 minutes.

As before, the circular dial will be shown on each trial. This time, however, both the marker and a word will be visible at the beginning of the trial.

The word will have been previously shown in part 1 and you will be required to remember its associated location on the circle. Please move the marker to the position that you remember being associated with the word as accurately as possible.

If you do not remember the location associated with that word, simply make a guess.

Once you have replaced the marker click on the “Submit” button to move onto the next trail.

Once Part 2 of the task has been completed, we will send you a website link back to Prolific.ac that where you can claim payment.

We ask that you complete each part of the experiment on a laptop or desktop computer, preferably equipped with a handheld computer mouse. Please do not attempt to use a smartphone or tablet as the task will not run on mobile devices.

This research project is being carried out by Doctors Sam Berens and Aidan Horner, both of whom are researchers at the University of York in the United Kingdom. If you have any questions, comments, or complaints about the study, please feel free to email them:

Dr Sam Berens: [sam.berens@york.ac.uk](mailto:sam.berens@york.ac.uk)

Dr Aidan Horner: [aidan.horner@york.ac.uk](mailto:aidan.horner@york.ac.uk)
